# Supplementary material for: Arduino Automated Microwave Oven for Tissue Decalcification
Source: MDPI journal article supplement (doi:10.3390/bioengineering10010079), 2023-01-06
Supplement: s1 [file s1]

## Article

# Arduino Automated Microwave Oven for Tissue Decalcification

Paolo Savadori <sup>1,2,\*</sup>, Sophia Dalfino <sup>1,3</sup>, Marco Piazzoni <sup>1,4</sup>, Francesco Inchingolo <sup>5</sup>, Massimo Del Fabbro <sup>1,2</sup>, Gianluca Martino Tartaglia <sup>1,2</sup> and Luciano Giardino <sup>6</sup>

<sup>1</sup> Department of Biomedical, Surgical and Dental Sciences, Università degli Studi di Milano, 20133 Milan, Italy

<sup>2</sup> IRCCS Fondazione Ca'Granda IRCCS Ospedale Maggiore Policlinico, 20122 Milan, Italy

<sup>3</sup> Complex Tissue Regeneration Department, MERLN Institute for Technology-Inspired Regenerative Medicine, 6229 Maastricht, The Netherlands

<sup>4</sup> C. Advanced Biomaterials Lab, Physics Department, Università degli Studi di Milano, 20133 Milano, Italy

<sup>5</sup> Interdisciplinary department of Medicine, Università di Bari "Aldo Moro", 70121 Bari, Italy

<sup>6</sup> Freelance Researcher; 88900 Crotona, Italy

\* Correspondence: [paolo.savadori@unimi.it](mailto:paolo.savadori@unimi.it) (P.S.)

## Supplementary Materials

**Table S1.** Arduino sketch.

```
// constants won't change
const int RELAY_PIN = 3; // the Arduino pin, which
connects to the IN pin of relay

// the setup function runs once when you press reset or
power the board
void setup() {
  // initialize digital pin as an output.
  pinMode(RELAY_PIN, OUTPUT);
}

// the loop function runs over and over again forever
void loop() {
  int i = 0;
  while ( i < 20000) {
    digitalWrite(RELAY_PIN, HIGH);
    delay(1);
    digitalWrite(RELAY_PIN, LOW);
    delay(1);
    i++;
  }
  digitalWrite (RELAY_PIN, LOW);
  delay(3600000);
}
```

**Table S2.** Modified hematoxylin and eosin protocol.

|                  |                                   |            |
|------------------|-----------------------------------|------------|
| Hydration        | Xylene                            | 15 minutes |
|                  | Ethanol 100%                      | 5 minutes  |
|                  | Ethanol 90%                       | 5 minutes  |
|                  | Ethanol 70%                       | 5 minutes  |
|                  | Distilled water                   | 5 minutes  |
| Nuclear staining | Morel and Bassal hematoxylin      | 15 minutes |
|                  | Composition:                      |            |
|                  | Solution A                        |            |
|                  | Hematoxylin                       | 1gr        |
|                  | Ethanol 95%                       | 100ml      |
|                  | Solution B                        |            |
|                  | Ferric chloride                   | 2gr        |
|                  | Cupric acetate                    | 0.04gr     |
| Differentiation  | Hydrochloric acid 37%             | 1ml        |
|                  | Mix solution A and solution B 1:1 |            |
|                  | Wash with distilled water         |            |
|                  | Acidified Ethanol                 | 5 seconds  |
| Bluening         | Composition: Ethanol              | 70%        |
|                  | HCl                               | 1%         |
|                  | Wash with distilled water         |            |
| Counterstaining  | Ammonium Hydroxide 1%             | 30 seconds |
|                  | Wash with distilled water         |            |
|                  | Ethanol 80%                       | 5 minutes  |
| dehydration      | Trichrome eosin                   | 5 minutes  |
|                  | Composition:                      |            |
|                  | Eosin 1% (H <sub>2</sub> O)       | 20ml       |
|                  | Phloxin B 1% (H <sub>2</sub> O)   | 2ml        |
|                  | Orange G 1% (H <sub>2</sub> O)    | 2ml        |
|                  | Glacial acetic acid               | 0.8ml      |
| Mount the slide  | Ethanol 95%                       | 156ml      |
|                  | Wash with distilled water         |            |
|                  | Ethanol 100%                      | 5 minutes  |
|                  | Ethanol 100%                      | 5 minutes  |
|                  | Xylene 100%                       | 5 minutes  |
|                  | Xylene 100%                       | 5 minutes  |
